# Supplementary material for: Nature and type of patient-reported safety incidents in primary care: cross-sectional survey of patients from Australia and England
Source: HighWire-hosted journal article supplement (doi:10.1136/bmjopen-2020-042551), 2021-04-01
Supplement: bmjopen-2020-042551supp001_data_supplement.pdf [file bmjopen-2020-042551supp001_data_supplement.pdf]

**Appendix 1. Study 1 Practice profile and characteristics**

|                                 | General Practice |            |            |             |             |            |            |             |            |
|---------------------------------|------------------|------------|------------|-------------|-------------|------------|------------|-------------|------------|
|                                 | P1               | P2         | P3         | P4          | P5          | P6         | P7         | P8          | P9         |
| No. registered patients (n)     | 15200            | 11135      | 9033       | 11819       | 12899       | 4189       | 21658      | 12810       | 3758       |
| Patients aged >65 (n %)         | 665 (4.4)        | 400 (3.6)  | 809 (9.0)  | 2531 (21.4) | 2632 (20.4) | 258 (6.2)  | 806 (3.7)  | 2824 (22.0) | 249 (6.6)  |
| Total no. GP (n)                | 8                | 7          | 6          | 10          | 6           | 2          | 14         | 7           | 4          |
| No. Male GP (n %)               | 2 (25.0)         | 3 (42.9)   | 3 (50.0)   | 3 (30.0)    | 2 (33.3)    | 1 (50.0)   | 6 (42.9)   | 3 (42.9)    | 2 (50.0)   |
| GP age ≥50 (n %)                | 3 (37.5)         | 2 (28.6)   | N/A        | N/A         | 4 (66.7)    | N/A        | 5 (35.7)   | N/A         | N/A        |
| GP age ≤34 (n %)                | 1 (12.5)         | 2 (28.6)   | N/A        | N/A         | 1 (16.7)    | N/A        | 2 (14.3)   | 2 (28.6)    | 1 (25.0)   |
| Deprivation*                    | 3                | 1          | 1          | 9           | 3           | 1          | 2          | 8           | 1          |
| QOF score†                      | 546              | 550        | 543        | 547         | 558         | 546        | 553        | 549         | 541        |
| Long term condition caseload‡   | 0.016            | 0.020      | 0.036      | 0.038       | 0.042       | 0.038      | 0.016      | 0.034       | 0.026      |
| Safety culture score§ (mean SD) | N/A              | 3.5 (0.99) | 4 (1)      | 4.2 (0.83)  | 4 (1.32)    | 3.8 (0.75) | 4.1 (0.90) | 4 (0.71)    | N/A        |
| PC PMOS score¶ (mean SD)        | 4.0 (0.50)       | 4.0 (0.56) | 3.7 (0.54) | 4.0 (0.37)  | 3.8 (0.43)  | 3.8 (0.54) | 3.7 (0.56) | 4.0 (0.46)  | 3.7 (0.50) |

\*Measured using the 2015 English Index of Multiple Deprivation Decile based on practice postcode. Deciles range from 1 to 10 with 1=most deprived and 10=least deprived.

†Quality and outcomes framework (QOF) overall score achieved in the financial year 2015-16. Maximum score is 559.

‡Long term condition caseload derived by summing the registers for all conditions in the QOF and dividing by list size.

§Safety culture score calculated using Agency for Healthcare Research and Quality Medical Office Survey on patient safety culture QG2 overall rating of patient safety. Scores range from 1 to 5; 1=poor, 2=fair, 3=good, 4=very good, 5=excellent. Scores cannot be calculated when less than n=5 surveys are returned (N/A shown for practices with less than 5 surveys returned).

¶Primary Care Patient Measure of Safety (PC PMOS) score uses 1 to 5 scale with lower scores indicating poorer safety.

P1, P2, P3...= Practice indicator, n=Number of participants, GP=General Practitioner, N/A=Not Available, QOF=Quality and Outcomes Framework, SD=Standard Deviation
