# Supplementary material for: Nature and type of patient-reported safety incidents in primary care: cross-sectional survey of patients from Australia and England
Source: HighWire-hosted journal article supplement (doi:10.1136/bmjopen-2020-042551), 2021-04-01
Supplement: bmjopen-2020-042551supp002_data_supplement.pdf [file bmjopen-2020-042551supp002_data_supplement.pdf]

**Appendix 2. Study 2 Practice profile and characteristics**

|                                     | Practice A | Practice B | Practice C | Practice D | Practice E | Practice F |
|-------------------------------------|------------|------------|------------|------------|------------|------------|
| Estimated number of unique patients | 9106       | 12000      | N/A        | 7232       | 3200       | 21725      |
| Estimated patient gender (%)        |            |            |            |            |            |            |
| Male                                | 40.79      | 45         | 50         | 47.91      | 45         | 46         |
| Female                              | 54.5       | 55         | 50         | 50.28      | 55         | 54         |
| Other or not recorded               | 4.71       | 0          | 0          | 1.8        | 0          | 0          |
| Estimated age distribution (%)      |            |            |            |            |            |            |
| Birth – 10 years                    | 10.1       | 9          | 8.58       | 13.7       | 8.1        | 11         |
| 11 – 18 years                       | 8.2        | 6          | 8.30       | 9.9        | 10.7       | 13         |
| 19 – 45 years                       | 34.3       | 26         | 24.02      | 35.8       | 25.7       | 32         |
| 46 – 64 years                       | 26.9       | 29         | 27.36      | 24.1       | 31.7       | 27         |
| 65 – 79 years                       | 15.2       | 21         | 22.13      | 11.9       | 17.1       | 11         |
| 80+ years                           | 5.3        | 9          | 9.60       | 4.6        | 6.3        | 6          |
| Number of patients seen per week    | N/A        | 850        | 271        | 326        | 245        | 1408       |

|                                      | Practice A             | Practice B      | Practice C      | Practice D                              | Practice E             | Practice F   |
|--------------------------------------|------------------------|-----------------|-----------------|-----------------------------------------|------------------------|--------------|
| Number of patients seen per month    | N/A                    | 3624            | 1084            | 1030                                    | N/A                    | 5471         |
| Number of new patients last month    | N/A                    | 69              | 50              | 58                                      | N/A                    | 180          |
| Number of consultations per week     | 576                    | 1584            | 454             | 393                                     | 245                    | 1260         |
| Number of consultations per month    | 2148                   | 5832            | 1816            | 1809                                    | N/A                    | 5216         |
| Top 5 patient diagnosis / conditions | Mental health          | Hypertension    | Hypertension    | Hypertension                            | Diabetes               | Obesity      |
|                                      | Musculoskeletal        | Hyperlipidaemia | Hyperlipidaemia | Asthma                                  | Ischemic heart disease | Diabetes     |
|                                      | Skin problems          | Asthma          | Osteoarthritis  | Depression                              | Hypertension           | Asthma       |
|                                      | Diabetes               | Depression      | Asthma          | Hypercholesterolaemia / hyperlipidaemia | Osteoarthritis         | Hypertension |
|                                      | Ischemic heart disease | Diabetes        | Depression      | Osteoarthritis                          | Renal disease          | Dyslipidemia |

|                                                                | Practice A                                                                                   | Practice B                                                                                   | Practice C                                                                                 | Practice D                                                                           | Practice E                                                          | Practice F                                                                |
|----------------------------------------------------------------|----------------------------------------------------------------------------------------------|----------------------------------------------------------------------------------------------|--------------------------------------------------------------------------------------------|--------------------------------------------------------------------------------------|---------------------------------------------------------------------|---------------------------------------------------------------------------|
| General Practitioners<br>(Number/FTE)                          | 8/6                                                                                          | -/12                                                                                         | 3/3                                                                                        | 6/4.5                                                                                | -/3                                                                 | 12/-                                                                      |
| Practice Nurses<br>(Number/FTE)                                | 5/-                                                                                          | -/4                                                                                          | 3/1.96                                                                                     | 4/1.6                                                                                | -/1                                                                 | -/3.9                                                                     |
| Reception /<br>Administration staff<br>(Number/FTE)            | 7/-                                                                                          | -/13                                                                                         | 6/2.54                                                                                     | 5/3.5                                                                                | -/2.5                                                               | -/9.8                                                                     |
| Practice Manager<br>(Number/FTE)                               | 1/-                                                                                          | -/1                                                                                          | 1/-                                                                                        | 1/0.8                                                                                | -/0.8                                                               | 1/-                                                                       |
| Medical students<br>(Number/FTE)                               | N/A                                                                                          | N/A                                                                                          | 1/1                                                                                        | N/A                                                                                  | N/A                                                                 | N/A                                                                       |
| General Practitioner<br>Average consultation<br>time (minutes) | 20                                                                                           | 15                                                                                           | 20                                                                                         | 23                                                                                   | 25                                                                  | 15                                                                        |
| Practice Nurse Average<br>consultation time<br>(minutes)       | 30                                                                                           | 30                                                                                           | 15                                                                                         | 30                                                                                   | 20                                                                  | 15                                                                        |
| Additional services<br>offered at practice                     | Physiotherapy,<br>Podiatry,<br>Psychologist/counse<br>lling, Youth mental<br>health service, | Psychologists,<br>Psychotherapist,<br>Men's health clinic,<br>Chronic disease<br>management, | Dietitian,<br>Psychiatrist,<br>Podiatry, Australian<br>Hearing – Audio<br>screening, Video | Physiotherapy,<br>Psychology, Dentist,<br>Audiology, Visiting<br>Physicians/surgeons | Osteopath,<br>Chiropractor,<br>Australian Hearing,<br>Psychologist, | Diabetes<br>Educator(s),<br>Dietitian, Podiatrist,<br>Mental health nurse |

|                                          | Practice A                                                                                                 | Practice B                                                                                                                                                                                                                               | Practice C                                                                                                                                                                                                           | Practice D | Practice E                                                                                                                                                              | Practice F                                                                                                                                                                          |
|------------------------------------------|------------------------------------------------------------------------------------------------------------|------------------------------------------------------------------------------------------------------------------------------------------------------------------------------------------------------------------------------------------|----------------------------------------------------------------------------------------------------------------------------------------------------------------------------------------------------------------------|------------|-------------------------------------------------------------------------------------------------------------------------------------------------------------------------|-------------------------------------------------------------------------------------------------------------------------------------------------------------------------------------|
|                                          | Speech Pathologist, Exercise physiologist                                                                  | Dietician, Diabetic educator, CVC program, neurologist                                                                                                                                                                                   | conferencing – specialist, Visiting specialists consulting at clinic – Paediatrics, orthopaedic, Surgeon – general, Physician, Oncology                                                                              |            | General surgeon consultations                                                                                                                                           |                                                                                                                                                                                     |
| Accreditation status / year              | Yes / 2018                                                                                                 | Yes / 2018                                                                                                                                                                                                                               | Yes / 2018                                                                                                                                                                                                           | Yes / 2017 | Yes / 2018                                                                                                                                                              | Yes / 2018                                                                                                                                                                          |
| Past safety and quality improvement work | <ul style="list-style-type: none"> <li>• Participation in Collaboratives (2013) – Diabetes wave</li> </ul> | <ul style="list-style-type: none"> <li>• Improvement foundation workshops for chronic kidney disease and diabetes</li> <li>• Closing the gap for ATSI patients</li> <li>• Research study investigating aspirin in the elderly</li> </ul> | <ul style="list-style-type: none"> <li>• Participation in Collaboratives Wave 10</li> <li>• Research studies investigating aspirin in the elderly, mental health, mothers health, bowel cancer prevention</li> </ul> | N/A        | <ul style="list-style-type: none"> <li>• Participation in Collaboratives – Wave 9 – Diabetes</li> <li>• 2018 – Practice Accreditation and Improvement Survey</li> </ul> | <ul style="list-style-type: none"> <li>• Participation in Collaboratives wave projects – Cardiovascular disease &amp; Chronic kidney disease and Improving Diabetes care</li> </ul> |

FTE: Full Time Equivalent

N/A: Not available
