# Supplementary material for: Nature and type of patient-reported safety incidents in primary care: cross-sectional survey of patients from Australia and England
Source: HighWire-hosted journal article supplement (doi:10.1136/bmjopen-2020-042551), 2021-04-01
Supplement: bmjopen-2020-042551supp003_data_supplement.pdf [file bmjopen-2020-042551supp003_data_supplement.pdf]

### Appendix 3. Questionnaire for capturing patient-reported safety incidents

Have you experienced something that you thought was a safety concern or issue in the last 12 months at this practice?

Yes ☐ (please continue)      No ☐ (please go to page X)

Please tell us what happened in as much detail as you can?

---

---

---

---

---

Why do you feel this was a 'safety concern' for you?

---

---

---

---

---

What do you think could be done to stop this from happening again to you or other patients, in the future?

---

---

---

---

---

Do you think it would have been possible to have stopped your experience from happening?

|                          |                          |                          |                          |                          |
|--------------------------|--------------------------|--------------------------|--------------------------|--------------------------|
| Definitely<br>yes        | Probably<br>yes          | Probably<br>not          | Definitely<br>not        | Don't know               |
| <input type="checkbox"/> |

On a scale of 1 to 10 how serious do you think your 'safety concern' was?

|                       |   |   |   |   |   |   |   |   |                      |
|-----------------------|---|---|---|---|---|---|---|---|----------------------|
| 1                     | 2 | 3 | 4 | 5 | 6 | 7 | 8 | 9 | 10                   |
| Not serious<br>at all |   |   |   |   |   |   |   |   | Extremely<br>serious |

Any other comments:

---

---

---

---

---

Thank you for taking the time to complete this questionnaire.
